# Supplementary material for: Tooth Loss and Blood Pressure in Parkinson’s Disease Patients: An Exploratory Study on NHANES Data
Source: MDPI journal article supplement (doi:10.3390/ijerph18095032), 2021-05-10
Supplement: s1 [file s1]

**Table S1.** STROBE Statement—Checklist of items that should be included in reports of *cross-sectional studies*.

|                           | Item No | Recommendation                                                                                                                                                                                               | Page |
|---------------------------|---------|--------------------------------------------------------------------------------------------------------------------------------------------------------------------------------------------------------------|------|
| Title and abstract        | 1       | (a) Indicate the study’s design with a commonly used term in the title or the abstract                                                                                                                       | 1    |
|                           |         | (b) Provide in the abstract an informative and balanced summary of what was done and what was found                                                                                                          | 1    |
| Introduction              |         |                                                                                                                                                                                                              |      |
| Background/rationale      | 2       | Explain the scientific background and rationale for the investigation being reported                                                                                                                         | 1–2  |
| Objectives                | 3       | State specific objectives, including any prespecified hypotheses                                                                                                                                             | 1–2  |
| Methods                   |         |                                                                                                                                                                                                              |      |
| Study design              | 4       | Present key elements of study design early in the paper                                                                                                                                                      | 2    |
| Setting                   | 5       | Describe the setting, locations, and relevant dates, including periods of recruitment, exposure, follow-up, and data collection                                                                              | 2    |
| Participants              | 6       | (a) Give the eligibility criteria, and the sources and methods of selection of participants                                                                                                                  | 2    |
| Variables                 | 7       | Clearly define all outcomes, exposures, predictors, potential confounders, and effect modifiers. Give diagnostic criteria, if applicable                                                                     | 2–3  |
| Data sources/ measurement | 8*      | For each variable of interest, give sources of data and details of methods of assessment (measurement). Describe comparability of assessment methods if there is more than one group                         | 3–4  |
| Bias                      | 9       | Describe any efforts to address potential sources of bias                                                                                                                                                    | 2–4  |
| Study size                | 10      | Explain how the study size was arrived at                                                                                                                                                                    | 2    |
| Quantitative variables    | 11      | Explain how quantitative variables were handled in the analyses. If applicable, describe which groupings were chosen and why                                                                                 | 2–4  |
| Statistical methods       | 12      | (a) Describe all statistical methods, including those used to control for confounding                                                                                                                        | 3–4  |
|                           |         | (b) Describe any methods used to examine subgroups and interactions                                                                                                                                          | 3–4  |
|                           |         | (c) Explain how missing data were addressed                                                                                                                                                                  | NA   |
|                           |         | (d) If applicable, describe analytical methods taking account of sampling strategy                                                                                                                           | NA   |
|                           |         | (e) Describe any sensitivity analyses                                                                                                                                                                        | NA   |
| Results                   |         |                                                                                                                                                                                                              |      |
| Participants              | 13*     | (a) Report numbers of individuals at each stage of study—eg numbers potentially eligible, examined for eligibility, confirmed eligible, included in the study, completing follow-up, and analysed            | 4    |
|                           |         | (b) Give reasons for non-participation at each stage                                                                                                                                                         | NA   |
|                           |         | (c) Consider use of a flow diagram                                                                                                                                                                           | 4    |
| Descriptive data          | 14*     | (a) Give characteristics of study participants (eg demographic, clinical, social) and information on exposures and potential confounders                                                                     | 4–7  |
|                           |         | (b) Indicate number of participants with missing data for each variable of interest                                                                                                                          | NA   |
| Outcome data              | 15*     | Report numbers of outcome events or summary measures                                                                                                                                                         | 4–7  |
| Main results              | 16      | (a) Give unadjusted estimates and, if applicable, confounder-adjusted estimates and their precision (eg, 95% confidence interval). Make clear which confounders were adjusted for and why they were included | 4–7  |
|                           |         | (b) Report category boundaries when continuous variables were categorized                                                                                                                                    | 4–7  |

|                          |    |                                                                                                                                                                            |     |
|--------------------------|----|----------------------------------------------------------------------------------------------------------------------------------------------------------------------------|-----|
|                          |    | (c) If relevant, consider translating estimates of relative risk into absolute risk for a meaningful time period                                                           | 4–7 |
| Other analyses           | 17 | Report other analyses done—eg analyses of subgroups and interactions, and sensitivity analyses                                                                             | 4–7 |
| <b>Discussion</b>        |    |                                                                                                                                                                            |     |
| Key results              | 18 | Summarise key results with reference to study objectives                                                                                                                   | 7–8 |
| Limitations              | 19 | Discuss limitations of the study, taking into account sources of potential bias or imprecision. Discuss both direction and magnitude of any potential bias                 | 7–8 |
| Interpretation           | 20 | Give a cautious overall interpretation of results considering objectives, limitations, multiplicity of analyses, results from similar studies, and other relevant evidence | 7–8 |
| Generalisability         | 21 | Discuss the generalisability (external validity) of the study results                                                                                                      | 7–8 |
| <b>Other information</b> |    |                                                                                                                                                                            |     |
| Funding                  | 22 | Give the source of funding and the role of the funders for the present study and, if applicable, for the original study on which the present article is based              | 9   |
